# Supplementary material for: The Sulfoquinovosyltransferase-like Enzyme SQD2.2 is Involved in Flavonoid Glycosylation, Regulating Sugar Metabolism and Seed Setting in Rice
Source: PubMed Central journal article supplement (PMC5498572; doi:10.1038/s41598-017-04002-2), 2017-07-05
Supplement: 41598_2017_4002_MOESM1_ESM.pdf [file 41598_2017_4002_MOESM1_ESM.pdf]

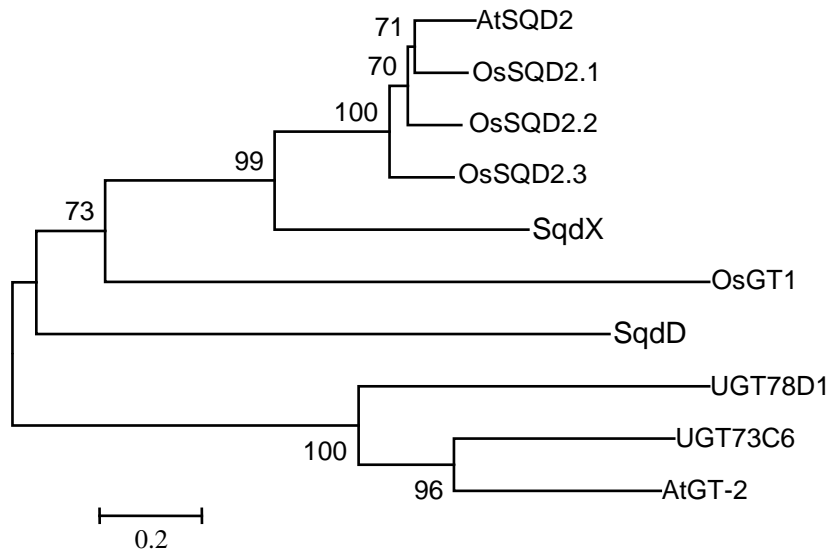

**Figure S2.** Phylogenetic analysis of rice SQD2.2 orthologs in plants and its relatives. The amino acid sequences of rice SQD2.2 orthologous proteins were aligned using the ClustalX program and were analyzed using the neighbor-joining method, with genetic distance calculated by MEGA5 software. The bar indicates substitutions per site. Bootstrap values (1000 replicates) above 70% are shown on the branches. The amino acid sequences and conserved domain of SQD2.2 orthologous proteins are shown in Figure S1. AtGT-2, At4g34138; OsGT1, Os01g15780; AtSQD2, AT5g01220; OsSQD2.1, Os07g01030; OsSQD2.2, Os01g04920; OsSQD2.3, Os03g15840; AtUGT78D1, AT1G30530; AtUGT73C6, AT2G36790; SqdX, *Synechococcus elongatus* PCC7924 (AAF14309); SqdD, *Rhodobacter sphaeroides* (ABA78725).

SQD2.2 1 **ATGGAATATCCCCACAATTCCCTACTCCCCAACTCCACACTCCAATCTCTTCCTCTCTTCTTCTTCTTCTTCTCGCCTCG**  
Seq-R 1 -----

SQD2.2 81 **CTTATATACGCGGCGTGTGAGCTCCTCCTCCTCTTCTTCTGCTCCACCACAACACCGTGCAGCTCGAGGCGCACGCAA**  
Seq-R 1 -----

SQD2.2 161 **ACGCCGTAGCGAGGAGAAGGATTGCTTCTTCTTTTTTTTTTGTGTGTGTGCTGTGTCTTGGGTTTCTTGCAATGGTG**  
Seq-R 1 -----

SQD2.2 241 **ATTGGGGCCGAGATCAAGGACGAGATGGAGGAGGCGCCGCCCTGCTGCTCGACGAGGCCGCGCCCTCGCCGCGTCCG**  
Seq-R 1 -----

SQD2.2 321 **GCTCTTCGTCGAGCCGCTCCTCGCTTACATCTCTGGGTACAAGAACCAGTTTCAGAACTTCATCAAGCACTTGCCGG**  
Seq-R 1 -----

SQD2.2 401 **AAATGGGGGATGAGGTGATTGTTGTGACCAACCATGAGGGGGTCCCCAAGAATCCATGGTGCCAAAGTTATTGGTTCA**  
Seq-R 1 -----

SQD2.2 481 **TGGAGCTTTCCCTGTCCAATGTATGGAAGTTCCTCTCTCGCTGGCACTCAGTCTAGGATTATTCGGAGGTTGCAAA**  
Seq-R 1 -----TTCGGAGGTTGCAAA

SQD2.2 561 **GTTCAGCCCTGACATCATTCATGCATCCTCACCTGGAATTATGGTTTTTGGGGCACTTGCTATTGCTAAACTGCTCGGTG**  
Seq-R 16 **GTTCAGCCCTGACATCATTCATGCATCCTCACCTGGAATTATGGTTTTTGGGGCACTTGCTATTGCTAAACTGCTCGGTG**

SQD2.2 641 **TCCCTCTAGTGATGCTCCTATCACACCCATGTCCAGTATACATTCCAAGATATACATTTAGCTGGCTTGTAGAGCCAAATG**  
Seq-R 95 **TCCCTCTAGTGATGCTCCTATCACACCCATGTCCAGTATACATTCCAAGATATACATTTAGCTGGCTTGTAGAGCCAAATG**

SQD2.2 721 **TGGCAAGTCATAAGGTTCCTTCATAGAGCTGCTGATCTAACATTAGTGCCATCTGTTGCTATCAGCAAAGATTTTGAAC**  
Seq-R 175 **TGGCAAGTCATAAGGTTCCTTCATAGAGCTGCTGATCTAACATTAGTGCCATCTGTTGCTATCAGCAAAGATTTTGAAC**

SQD2.2 801 **TGCCCATGTTATATCAGCTAATAGAATACGCCTTGGAAACAAAGGTGTTGATTCAGCCAGTTCCATCCCAAGTTCCGCA**  
Seq-R 255 **TGCCCATGTTATATCAGCTAATAGAATACGCCTTGGAAACAAAGGTGTTGATTCAGCCAGTTCCATCCCAAGTTCCGCA**

SQD2.2 881 **GTACGAAATGCGAGTTAGACTAAGTGACGGTGAGCCTGAAAAACCATTGATAATCCATGTAGGACGCTTTGGGCGTGAA**  
Seq-R 335 **GTACGAAATGCGAGTTAGACTAAGTGACGGTGAGCCTGAAAAACCATTGATAATCCATGTAGGACGCTTTGGGCGTGAA**

SQD2.2 961 **AAGAACTTGGATTTTCTGAAAACGGTAATGGATAGGCTGCCTGGAGTAAGAATTGCATTTATTGGAGATGGACCATACAG**  
Seq-R 415 **AAGAACTTGGATTTTCTGAAAACGGTAATGGATAGGCTGCCTGGAGTAAGAATTGCATTTATTGGAGATGGACCATACAG**

SQD2.2 1041 **GAGTGAGCTGGAGAAGATGTTTGAGGGGATGCCTGCCGTGTTCACTGGAATGATGCAAGGCGAAGAGCTATCACAGGCAT**  
Seq-R 495 **GAGTGAGCTGGAGAAGATGTTTGAGGGGATGCCTGCCGTGTTCACTGGAATGATGCAAGGCGAAGAGCTATCACAGGCAT**

SQD2.2 1121 **ATGCCAGCGGTGATGTTTTCTGATGATGCCCTCGGAGTCCGAAACACTTGGTCAAGTAGTCTGGAGTCCATGTCATCTGGA**  
Seq-R 575 **ATGCCAGCGGTGATGTTTTCTGATGATGCCCTCGGAGTCCGAAACACTTGGTCAAGTAGTCTGGAGTCCATGTCATCTGGA**

SQD2.2 1201 **GTCCCGGTCGTGACGCTCGTGCTGGTGGTGTCTCTGATATAATTCCAGAAGATCAGGAAGGGAAGACCAGCTTCTCTGTT**  
Seq-R 655 **GTCCCGGTCGTGACGCTCGTGCTGGTGGTGTCTCTGATATAATTCCAGAAGATCAGGAAGGGAAGACCAGCTTCTCTGTT**

SQD2.2 1281 **CACCCAGGAGACCTCGAAGACTGTCTTGGCAAGATTCAGCTATTGCTGACGGACAAGGAATTCAGAGACAACATGGGGA**  
Seq-R 735 **CACCCAGGAGACCTCGAAGACTGTCTTGGCAAGATTCAGCTATTGCTGACGGACAAGGAATTCAGAGACAACATGGGGA**

SQD2.2 1361 **TGACGGCTAGAGCCGAGATGGAGAAGTCCGACTGGAGAGCAGCTTCCAAGAAGATCCGCAACGAGTTCTACAATGCTGCC**  
Seq-R 815 **TGACGGCTAGAGCCGAGATGGAGAAGTCCGACTGGAGAGCAGCTTCCAAGAAGATCCGCAACGAGTTCTACAATGCTGCC**

SQD2.2 1441 **ATCTGGTACTGGAGGAAGAAGCGCGCAGAATTGATCAAAACCGTTGCAGTGGCTGGCGCAGATGTTCTTACCAGCACCTGA**  
Seq-R 895 **ATCTGGTACTGGAGGAAGAAGCGCGCAGAATTGATCAAAACCGTTGCAGTGGCTGGCGCAGATGTTCTTACCAGCACCTGA**

SQD2.2 1521 **GGTCAACAGAATCACACAACACTGA**  
Seq-R -----

**Figure S3.** The sequencing result of the PCR bands in Figure 1A. Seq-R indicates the sequencing result using the vector-specific primer.

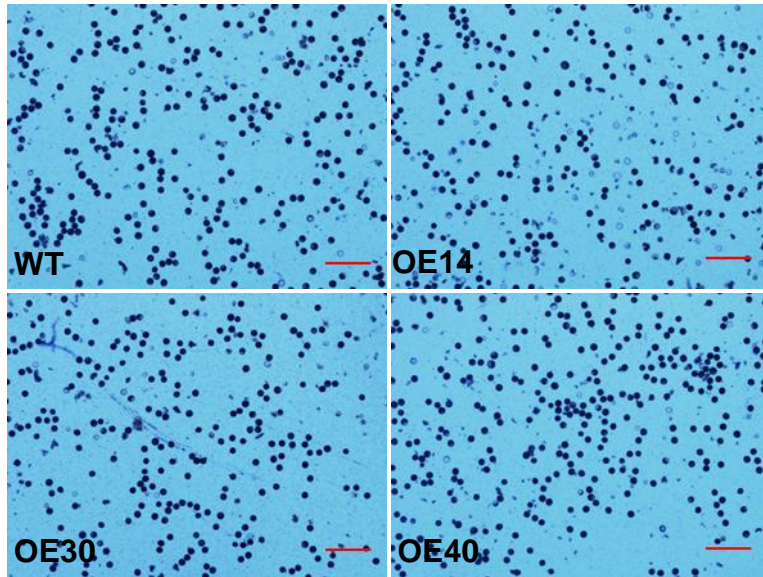

**Figure S4.** The I<sub>2</sub>-KI stained pollen grains of wild-type and *SQD2.2*-OE plants at anthesis stage. Bars = 400 μm.

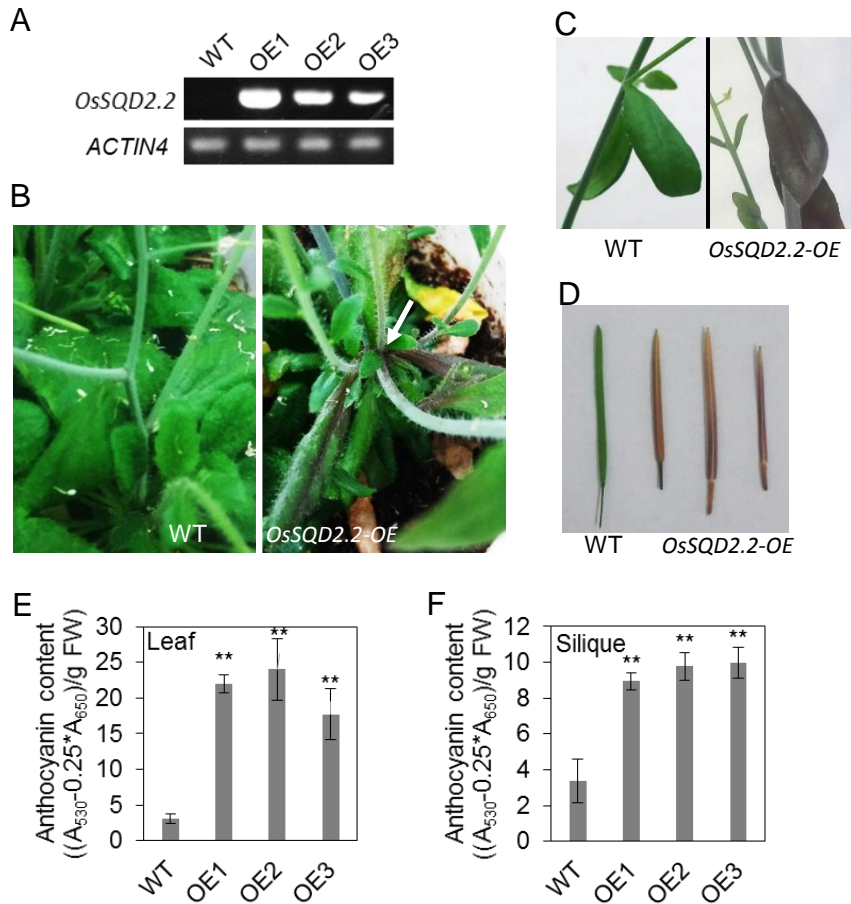

**Figure S5.** Overexpression of rice *SQD2.2* resulted in flavonoid accumulation in Arabidopsis. (A) Rice *SQD2.2* is overexpressed in Arabidopsis and the expression level was confirmed by semi-quantitative RT-PCR. (B) to (D) Overexpression of *SQD2.2* enhanced the purple color in leaves, stems, and siliques of Arabidopsis. (E) and (F) Overexpression of *SQD2.2* conferred the anthocyanin accumulation in leaves and siliques of Arabidopsis. Values are the mean  $\pm$  SD ( $n = 3$ ). Student's *t* test, \*  $P < 0.05$ ; \*\*  $P < 0.01$ .
